# Supplementary material for: Predicting lung adenocarcinoma prognosis with a novel risk scoring based on platelet-related gene expression
Source: publisher site journal article supplement (doi:10.18632/aging.202682), 2021-02-22
Supplement: Supplementary file [file aging-v13i6-202682-supplementary-material-SD1.pdf]

**SUPPLEMENTARY FIGURES**

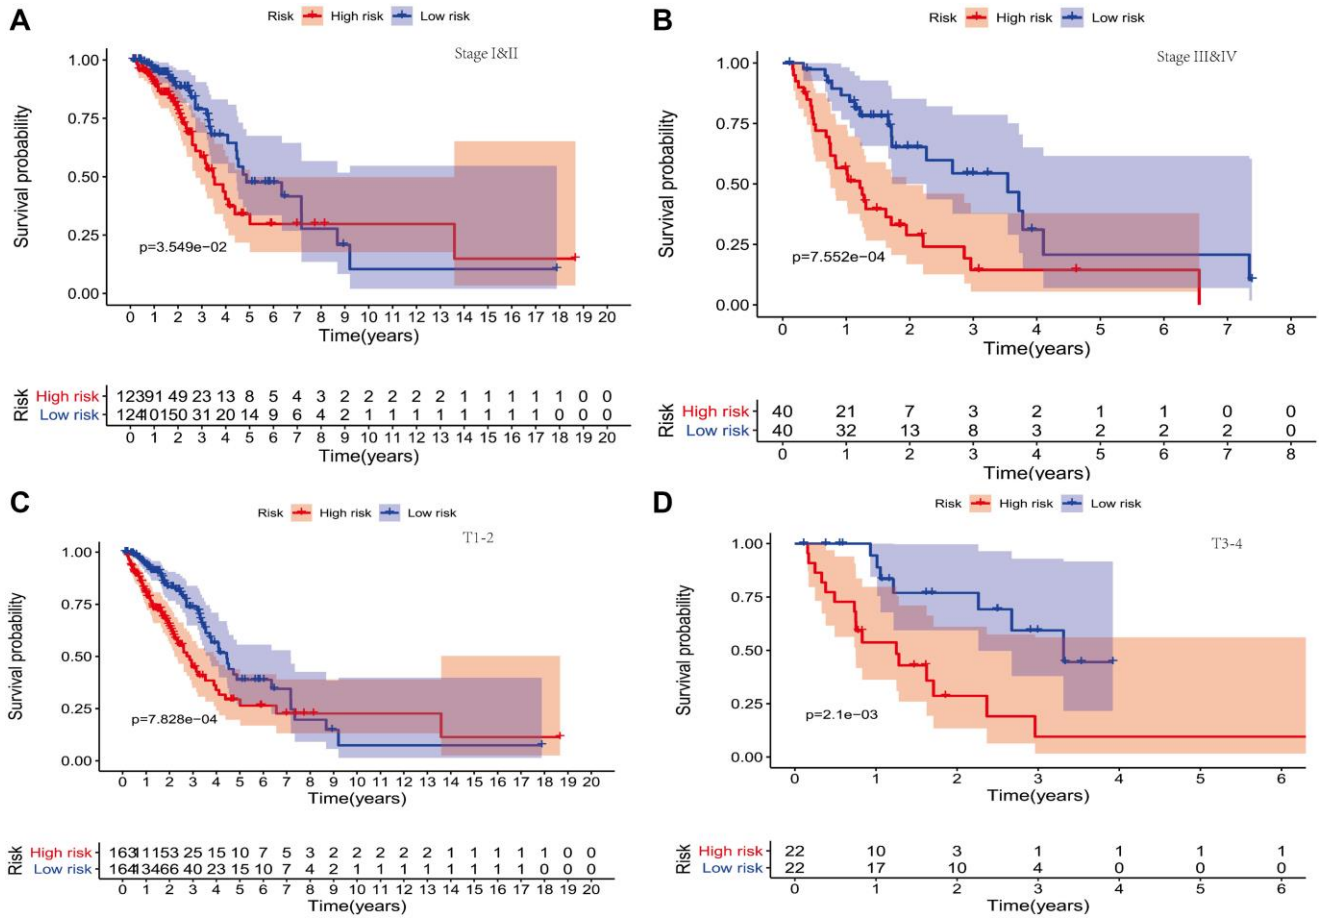

Supplementary Figure 1. Kaplan-Meier survival analysis according to the PRS in the TCGA cohort. (A, B) TNM stage. (C, D) T stage.

**A** Operation interface 1: Upload your own data

**A nomogram(Z.C.M)**

please select age: >65

Choose csv File  
Browse... DATA.txt  
Upload complete

please select gender: Male

please select stage: Stage I&II

please select T: T1-2

please select M: M0

please select N: N0

please select riskScore: Low

Call:  
NULL

Deviance Residuals:  
Min IQ Median 3Q Max  
-1.2301 -0.9144 -0.7910 1.3159 1.8236

Coefficients:  
Estimate Std. Error z value Pr(>|z|)  
(Intercept) -1.120613 0.273543 -4.097 4.19e-05 \*\*\*  
`age>65` 0.240025 0.241285 0.995 0.3198  
genderMale -0.332019 0.241719 -1.374 0.1696  
`stageStage III&IV` -0.007974 0.392578 -0.020 0.9838  
`T3-4` 0.078099 0.381828 0.205 0.8379  
MM1 0.521549 0.547749 0.952 0.3410  
`M1-3` 0.560691 0.294859 1.902 0.0572 .  
riskScoreLow 0.372876 0.242113 1.540 0.1235  
---  
Signif. codes: 0 '\*\*\*' 0.001 '\*\*' 0.01 '\*' 0.05 '.' 0.1 ' ' 1

(Dispersion parameter for binomial family taken to be 1)

Null deviance: 414.88 on 326 degrees of freedom  
Residual deviance: 404.66 on 319 degrees of freedom  
AIC: 420.66

Number of Fisher Scoring iterations: 4

predict

**B** Operation Interface 2: Personalized Prediction of Prognosis of Patients

please select gender: Male

please select stage: Stage I&II

please select T: T1-2

please select M: M1

please select N: N0

please select riskScore: Low

Call:  
NULL

Deviance Residuals:  
Min IQ Median 3Q Max  
-1.2301 -0.9144 -0.7910 1.3159 1.8236

Coefficients:  
Estimate Std. Error z value Pr(>|z|)  
(Intercept) -1.120613 0.273543 -4.097 4.19e-05 \*\*\*  
`age>65` 0.240025 0.241285 0.995 0.3198  
genderMale -0.332019 0.241719 -1.374 0.1696  
`stageStage III&IV` -0.007974 0.392578 -0.020 0.9838  
`T3-4` 0.078099 0.381828 0.205 0.8379  
MM1 0.521549 0.547749 0.952 0.3410  
`M1-3` 0.560691 0.294859 1.902 0.0572 .  
riskScoreLow 0.372876 0.242113 1.540 0.1235  
---  
Signif. codes: 0 '\*\*\*' 0.001 '\*\*' 0.01 '\*' 0.05 '.' 0.1 ' ' 1

(Dispersion parameter for binomial family taken to be 1)

Null deviance: 414.88 on 326 degrees of freedom  
Residual deviance: 404.66 on 319 degrees of freedom  
AIC: 420.66

Number of Fisher Scoring iterations: 4

predict

| age    | gender | stage      | T    | M  | N  | riskScore | predict   |
|--------|--------|------------|------|----|----|-----------|-----------|
| 1 <=65 | Male   | Stage I&II | T1-2 | M1 | N0 | Low       | 0.3639625 |

**Supplementary Figure 2. Operating page of nomogram online web page prediction tool based on risk score and clinical characteristics. (A) Upload data operation page. (B) Personalized Selection of Patient Information Operation Interface.**

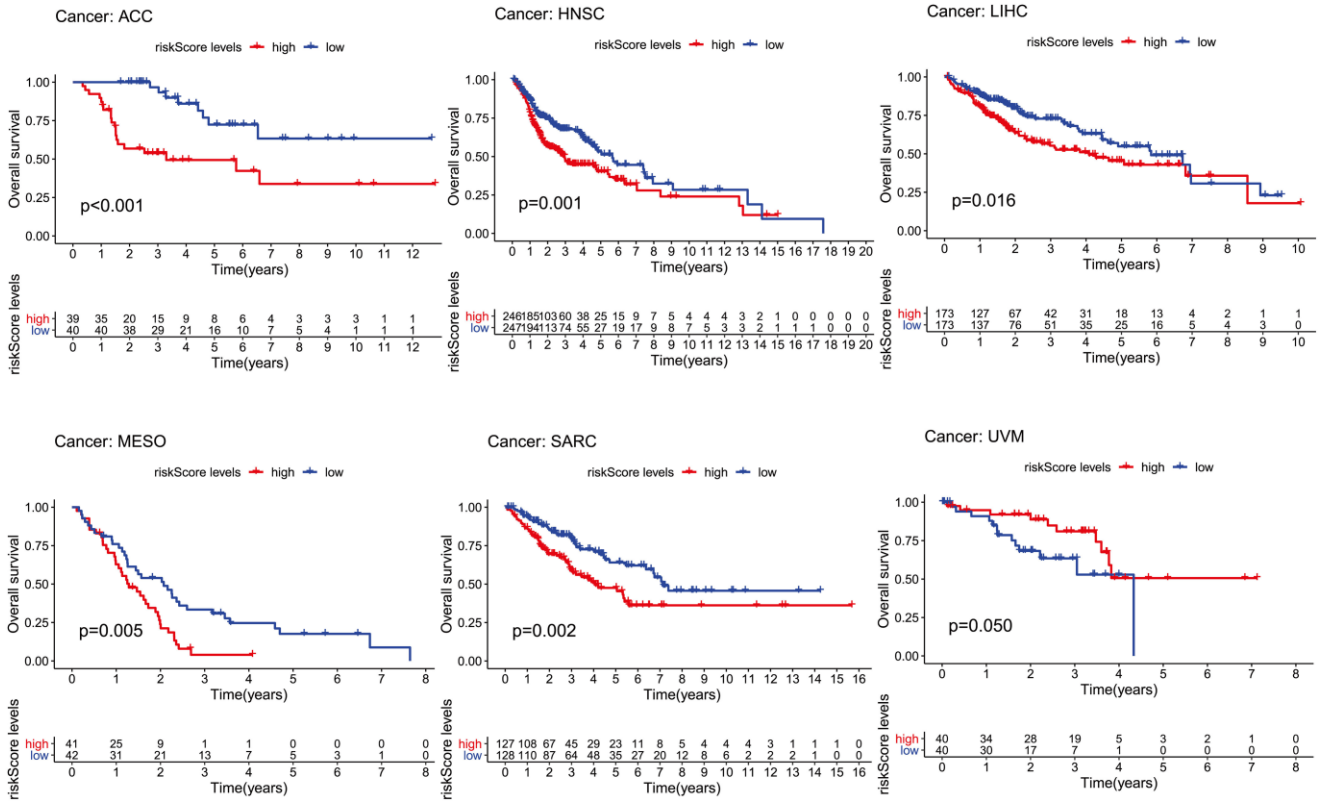

Supplementary Figure 3. Correlation between PRS and other 6 cancers.
